# Supplementary material for: Association of Driver Oncogene Variations With Outcomes in Patients With Locally Advanced Non–Small Cell Lung Cancer Treated With Chemoradiation and Consolidative Durvalumab
Source: PubMed Central journal article supplement (PMC9171557; doi:10.1001/jamanetworkopen.2022.15589), 2022-06-06
Supplement: jamanetwopen-e2215589-s001.pdf [file jamanetwopen-e2215589-s001.pdf]

## Supplemental Online Content

Liu Y, Zhang Z, Rinsurongkawong W, et al. Association of driver oncogene variations with outcomes in patients with locally advanced non–small cell lung cancer treated with chemoradiation and consolidative durvalumab. *JAMA Netw Open*. 2022;5(6):e2215589. doi:10.1001/jamanetworkopen.2022.15589

**eTable 1.** Variations and Salvage Therapies of All Patients

**eTable 2.** Multivariate Regression Analysis for Time to Second Progression

**eFigure 1.** Progression-Free Survival (PFS) and Overall Survival (OS) for Nonsquamous NSCLC Patients With or Without Driver Variations Treated With Definitive Chemoradiation and Consolidative Durvalumab

**eFigure 2.** Time to Second Progression (PFS2) in Non-Squamous Patients With or Without Driver Variations Who Progressed After Definitive Chemoradiation and Consolidative Durvalumab

This supplemental material has been provided by the authors to give readers additional information about their work.

**eTable 1.** Variations and Salvage Therapies of All Patients

| UID  | Driver Mutation        | Other Identified Mutations                                                    | Progression? | TKI Therapy (* - first post-relapse therapy)   | Other Salvage Therapy (* - first post-relapse therapy) |
|------|------------------------|-------------------------------------------------------------------------------|--------------|------------------------------------------------|--------------------------------------------------------|
| 7008 | EML4-ALK Fusion        | None                                                                          | Y            | Alectinib*                                     |                                                        |
| 7440 | EML4-ALK Fusion        | None                                                                          | Y            | Alectinib*                                     |                                                        |
| 8105 | EML4-ALK Fusion        | None                                                                          | N            | No progression                                 |                                                        |
| 6504 | EML4-ALK Fusion        | MTOR                                                                          | Y            | Brigatinib*                                    |                                                        |
| 7865 | EML4-ALK Fusion        | TP53, MLH1, BRCA2                                                             | Y            | Alectinib*                                     |                                                        |
| 6075 | EML4-ALK Fusion        | TP53                                                                          | Y            | Alectinib*                                     |                                                        |
| 8017 | EGFR exon 19 deletion  | None                                                                          | Y            | Osimertinib*                                   |                                                        |
| 6035 | EGFR exon 19 deletion  | TP53, ARID1A, CCNE1, MYC, PIK3CA, TSC1, ATM                                   | Y            | Osimertinib*                                   |                                                        |
| 7333 | EGFR exon 19 deletion  | TP53, PIK3CA, RB1                                                             | Y            | Osimertinib                                    | Radiation*                                             |
| 5755 | EGFR exon 19 deletion  | TP53                                                                          | Y            | Osimertinib*                                   |                                                        |
| 8200 | EGFR exon 19 deletion  | TP53, NOTCH1                                                                  | Y            | Osimertinib                                    | Radiation*                                             |
| 5779 | EGFR exon 19 deletion  | CTNNB1, MET                                                                   | Y            | Osimertinib*                                   |                                                        |
| 4914 | EGFR exon 19 deletion  | KDR, PIK3CA                                                                   | N            |                                                |                                                        |
| 7452 | EGFR exon 20 insertion | TP53, cMET amp, RB1                                                           | Y            | Pozotinib                                      | Chemoradiation*                                        |
| 5516 | EGFR exon 21, L858R    | TP53, CDK6                                                                    | Y            | Osimertinib                                    |                                                        |
| 5585 | EGFR exon 21, L858R    | TP53                                                                          | Y            | Osimertinib (Induction), Neratinib/Palbociclib | Carboplatin/Pemetrexed/Bevacizumab*                    |
| 5932 | EGFR exon 21, L858R    | TP53, PIK3CA, PTEN, RB1                                                       | Y            | Osimertinib*                                   | Radiation/Surgery                                      |
| 6000 | EGFR exon 21, L858R    | JAK2, NF1                                                                     | Y            | Osimertinib (Induction and salvage)            | Radiation/Surgery*                                     |
| 7785 | HER2 exon 20 insertion | MAP2K4                                                                        | Y            | Pozotinib*                                     |                                                        |
| 7030 | MET exon 14 skipping   | None                                                                          | N            |                                                |                                                        |
| 7217 | NTRK2 fusion           | TP53, ARID1A, EGFR exon 3, FANCA, FGFR4, MSH6, NFE2L2, PIK3CA, RNF43, SMARCB1 | Y            | Larotrectinib                                  | Radiation*                                             |
| 7497 | KRAS G12A              | TP53, CREBBP, NF2                                                             | Y            |                                                | Radiation/Surgery*                                     |
| 6682 | KRAS G12C              | None                                                                          | N            |                                                |                                                        |
| 6564 | KRAS G12C              | STK11, CCNE1                                                                  | Y            |                                                | Radiation*                                             |
| 5353 | KRAS G12C              | ATM, NOTCH1, PALB2, TERT                                                      | Y            |                                                | Radiation*                                             |
| 8610 | KRAS G12C              | STK11                                                                         | Y            |                                                | Taxotere/Ramucirumab*                                  |
| 6126 | KRAS G12C              | TP53, STK11, APC, CDH1, CDKN2A, FGFR1, MYC, TET2                              | Y            |                                                | Radiation/AZD9150*                                     |

| UID  | Driver Mutation | Other Identified Mutations                      | Progression? | TKI Therapy (* - first post-relapse therapy) | Other Salvage Therapy (* - first post-relapse therapy) |
|------|-----------------|-------------------------------------------------|--------------|----------------------------------------------|--------------------------------------------------------|
| 7956 | KRAS G12C       | TP53, ARID1A, BRCA1                             | Y            |                                              | Carboplatin/Pemetrexed/Pembrolizumab*                  |
| 7376 | KRAS G12C       | ARID1A                                          | Y            |                                              | Radiation*                                             |
| 4332 | KRAS G12C       | ATM                                             | N            |                                              |                                                        |
| 7439 | KRAS G12C       | TP53, STK11                                     | Y            | AMG510 (sotorasib)                           | Carboplatin/Pemetrexed/Pembrolizumab*                  |
| 7629 | KRAS G12D       | TP53, ATR, BRCA2, PIK2CA                        | N            |                                              |                                                        |
| 6038 | KRAS G12D       | TP53, STK11, POLE                               | N            |                                              |                                                        |
| 7143 | KRAS G12D       | TP53                                            | Y            |                                              | Carboplatin/Pemetrexed/Pembrolizumab*                  |
| 7891 | KRAS G12D       | STK11, NFE2L2                                   | Y            |                                              | Docetaxel/Ramucirumab*                                 |
| 6734 | KRAS G12R       | AKT3, IGF1R, NOTCH3, CTNNB1, U2AF1              | Y            |                                              | Radiation*, Carboplatin/Pemetrexed/Pembrolizumab       |
| 7601 | KRAS G12V       | STK11, KEAP1                                    | Y            |                                              | Carboplatin/Pemetrexed/Bevacizumab*                    |
| 6939 | KRAS G12V       | STK11                                           | Y            |                                              | 2018-0985 IPN60090*                                    |
| 8043 | KRAS G12V       | TP53, ATM, AXL, CREBBP, NOTCH2                  | Y            |                                              | Carboplatin/Abraxane/Pembrolizumab*                    |
| 6459 | KRAS G13C       | TP53                                            | Y            |                                              | Carboplatin/Paclitaxel*                                |
| 8621 | KRAS Q22K       | STK11, ATM, ATRX                                | Y            |                                              | Radiation*, PD1-TIM-3                                  |
| 6594 | KRAS Q61H       | TP53, ARID1A, U2AF1, FGFR4                      | Y            |                                              | Ipilimumab/Nivolumab*                                  |
| 7955 | KRAS Q61H       | PTCH1                                           | Y            |                                              | Radiation*                                             |
| 6132 | None            | TP53, ATM, CDKN2A, FBXW1, PIK3R1                | Y            |                                              | Carboplatin/Paclitaxel*                                |
| 8649 | None            | None                                            | Y            |                                              | Taxotere*                                              |
| 7414 | None            | TP53, ATR, CDKN2A, NFE2L2, PIK3CA, TERT         | Y            |                                              | Carboplatin/Paclitaxel/Pembrolizumab*                  |
| 6767 | None            | TP53, FGFR1                                     | Y            |                                              | Carboplatin/Paclitaxel/Pembrolizumab*                  |
| 8532 | None            | None                                            | Y            |                                              | JTX-2011/Ipilimumab*                                   |
| 4707 | None            | TP53, STK11, BRCA2, FGFR1                       | Y            |                                              | Radiation/Surgery*                                     |
| 8261 | None            | None                                            | Y            |                                              | Pemetrexed/Pembrolizumab*                              |
| 7384 | None            | None                                            | Y            |                                              | Surgery*                                               |
| 6577 | None            | TP53, EGFR amplification, FGFR2, SETD2, SMARCA4 | Y            |                                              |                                                        |
| 8086 | None            | TP53, BRCA1                                     | Y            |                                              | Carboplatin/Pemetrexed*                                |
| 5760 | None            | TP53, STK11, PTEN                               | Y            |                                              |                                                        |
| 7459 | None            | TP53, MAP2K1                                    | Y            |                                              | Carboplatin/Pemetrexed/Pembrolizumab*                  |
| 7078 | None            | TP53                                            | Y            |                                              |                                                        |
| 5788 | None            | TP53, ATM, CDKN2A, FLT3, ROS1, TERT             | Y            |                                              | Surgery*                                               |
| 7356 | None            | TP53, CDKN2A                                    | Y            |                                              | Carboplatin/Pemetrexed/Pembrolizumab*                  |
| 5571 | None            | KDR, KIT, PIK3CA                                | Y            |                                              | Radiation*                                             |
| 4483 | None            | TP53, APC, BRCA2, CCND1, PIK3R1                 | Y            |                                              | NKTR-214/Nivolumab*                                    |
| 5096 | None            | ARID1A, BRCA1, FGFR3, MAP2K1, MTOR, PIK3CA      | Y            |                                              | Carboplatin/Pemetrexed/Pembrolizumab*                  |
| 6893 | None            | None                                            | Y            |                                              | Carboplatin/Paclitaxel/Pembrolizumab*                  |
| 7372 | None            | TP53, ATRX, MDM2, NOTCH2, RAD50, RAD51B, TSC2   | Y            |                                              | Chemoradiation*                                        |
| 5430 | None            | TP53                                            | Y            |                                              | Carboplatin/Abraxane/Atezolizumab*                     |

| UID  | Driver Mutation | Other Identified Mutations                                                                                                                                                                                                                                                                             | Progression? | TKI Therapy (* - first post-relapse therapy) | Other Salvage Therapy (* - first post-relapse therapy) |
|------|-----------------|--------------------------------------------------------------------------------------------------------------------------------------------------------------------------------------------------------------------------------------------------------------------------------------------------------|--------------|----------------------------------------------|--------------------------------------------------------|
| 4791 | None            | None                                                                                                                                                                                                                                                                                                   | Y            |                                              |                                                        |
| 5122 | None            | None                                                                                                                                                                                                                                                                                                   | Y            |                                              | Radiation*                                             |
| 6193 | None            | TP53, AKT2, NFE2L2, NOTCH2, PIK3CA, SLX4                                                                                                                                                                                                                                                               | Y            |                                              | Nivolumab*                                             |
| 7582 | None            | TP53, CDKN2A, FGFR3, NOTCH1                                                                                                                                                                                                                                                                            | Y            |                                              | Carboplatin/Pemetrexed/Pembrolizumab*                  |
| 7599 | None            | STK11, CTNNB1                                                                                                                                                                                                                                                                                          | Y            |                                              | Radiation*                                             |
| 5749 | None            | TP53, ATM, CDKN2A, EGFR exon 28                                                                                                                                                                                                                                                                        | Y            |                                              | Carboplatin/Paclitaxel*                                |
| 8591 | None            | TP53, STK11, MYCL, TERT, CTNNB1, NBN, SMARCA4                                                                                                                                                                                                                                                          | N            |                                              |                                                        |
| 5844 | None            | None                                                                                                                                                                                                                                                                                                   | N            |                                              |                                                        |
| 8358 | None            | TP53, NTRK3, PPARG                                                                                                                                                                                                                                                                                     | N            |                                              |                                                        |
| 7450 | None            | TP53, STK11, AKT1, ARID1A, ATM, ATR, BAP1, BRAF E695Q, BRCA1, BRCA2, CCND2, CDK2, CDKN1B, CDKN2A, CREBBP, CSF1R, ERBB2, ERBB3, FANCA, FANCD2, FGFR4, KIT, MDM2, MRE11A, MSH2, MSH6, NF1, NOTCH2, NTRK1, PALB2, PDGFRB, PDL1, PIK3CA, POLE, PTCH1, RAD50, RAD51D, RB1, SETD2, SMARCB1, TERT, TSC1, TSC2 | N            |                                              |                                                        |
| 5025 | None            | APC, FGFR1                                                                                                                                                                                                                                                                                             | N            |                                              |                                                        |
| 6507 | None            | None                                                                                                                                                                                                                                                                                                   | N            |                                              |                                                        |
| 7097 | None            | STK11                                                                                                                                                                                                                                                                                                  | N            |                                              |                                                        |
| 7109 | None            | TP53, CDK6, KRAS amplification, RAF1                                                                                                                                                                                                                                                                   | N            |                                              |                                                        |
| 8248 | None            | None                                                                                                                                                                                                                                                                                                   | N            |                                              |                                                        |
| 6906 | None            | None                                                                                                                                                                                                                                                                                                   | N            |                                              |                                                        |
| 4985 | None            | None                                                                                                                                                                                                                                                                                                   | N            |                                              |                                                        |
| 8277 | None            | TP53, ATM, FLT3, PIK3CA                                                                                                                                                                                                                                                                                | N            |                                              |                                                        |
| 5896 | None            | None                                                                                                                                                                                                                                                                                                   | N            |                                              |                                                        |
| 7381 | None            | TP53, ARID1A, EGFR amplification, RICTOR, SMARCA1, TERT                                                                                                                                                                                                                                                | N            |                                              |                                                        |
| 5569 | None            | TP53, KDR, PIK3CA                                                                                                                                                                                                                                                                                      | N            |                                              |                                                        |
| 5965 | None            | None                                                                                                                                                                                                                                                                                                   | N            |                                              |                                                        |
| 7246 | None            | None                                                                                                                                                                                                                                                                                                   | N            |                                              |                                                        |
| 6736 | None            | None                                                                                                                                                                                                                                                                                                   | N            |                                              |                                                        |
| 5155 | None            | FBXW7, NOTCH1                                                                                                                                                                                                                                                                                          | N            |                                              |                                                        |
| 7808 | None            | None                                                                                                                                                                                                                                                                                                   | N            |                                              |                                                        |

| UID  | Driver Mutation | Other Identified Mutations                                                         | Progression? | TKI Therapy (* - first post-relapse therapy) | Other Salvage Therapy (* - first post-relapse therapy) |
|------|-----------------|------------------------------------------------------------------------------------|--------------|----------------------------------------------|--------------------------------------------------------|
| 6641 | None            | None                                                                               | N            |                                              |                                                        |
| 5491 | None            | TP53                                                                               | N            |                                              |                                                        |
| 7128 | None            | None                                                                               | N            |                                              |                                                        |
| 6666 | None            | None                                                                               | N            |                                              |                                                        |
| 7815 | None            | BCORL1, KDM6A, PIGA, WT1                                                           | N            |                                              |                                                        |
| 7167 | None            | None                                                                               | N            |                                              |                                                        |
| 7854 | None            | None                                                                               | N            |                                              |                                                        |
| 7765 | None            | TP53, PTEN                                                                         | N            |                                              |                                                        |
| 7539 | None            | None                                                                               | N            |                                              |                                                        |
| 8196 | None            | TP53, AXL, BRCA2, DDR2, FANCI, KIT, NF1, PIK3CA, PIK3R1, SMO, TERT                 | N            |                                              |                                                        |
| 7665 | None            | None                                                                               | N            |                                              |                                                        |
| 8692 | None            | None                                                                               | N            |                                              |                                                        |
| 6726 | None            | TP53, BRCA2, CCND1, CDKN2A, FGF19, FGF13, FGFR1, KRAS amplification, NOTCH1, SETD2 | N            |                                              |                                                        |
| 5072 | None            | TP53                                                                               | N            |                                              |                                                        |

**eTable 2.** Multivariate Regression Analysis for Time to Second Progression

| Characteristic     | Hazard Ratio | 95% Confidence Interval | P-value |
|--------------------|--------------|-------------------------|---------|
| Mutation Status    |              |                         |         |
| Non-Driver         | 1.00         |                         |         |
| Non-KRAS Driver    | 0.29         | 0.11-0.78               | 0.01    |
| KRAS Driver        | 1.07         | 0.42-2.74               | 0.88    |
| Sex                |              |                         |         |
| Male               | 1.00         |                         |         |
| Female             | 0.53         | 0.25-1.10               | 0.09    |
| Smoking Status     |              |                         |         |
| Former or Current  | 1.00         |                         |         |
| Never              | 0.93         | 0.31-2.79               | 0.90    |
| Stage              |              |                         |         |
| IIB                | 1.00         |                         |         |
| IIIA               | 4.75         | 0.48-46.79              | 0.18    |
| IIIB               | 3.29         | 0.36-29.94              | 0.29    |
| IIIC               | 6.48         | 0.56-75.48              | 0.14    |
| Age                |              |                         |         |
| <65                | 1.00         |                         |         |
| ≥65                | 1.19         | 0.59-2.42               | 0.63    |
| ECOG               |              |                         |         |
| 0-1                | 1.00         |                         |         |
| 2                  | 1.06         | 0.40-2.84               | 0.91    |
| PD-L1              |              |                         |         |
| Negative (0% TPS)  | 1.00         |                         |         |
| Low (1-49% TPS)    | 0.45         | 0.14-1.41               | 0.17    |
| High (≥50% TPS)    | 0.82         | 0.24-2.83               | 0.75    |
| Not Tested         | 1.02         | 0.33-3.13               | 0.98    |
| Histology          |              |                         |         |
| Adenocarcinoma     | 1.00         |                         |         |
| Non-Adenocarcinoma | 1.00         | 0.41-2.43               | 1.00    |

**eFigure 1.** Progression-Free Survival (PFS) and Overall Survival (OS) for NSCLC Patients With or Without Driver Variations Treated With Definitive Chemoradiation and Consolidative Durvalumab

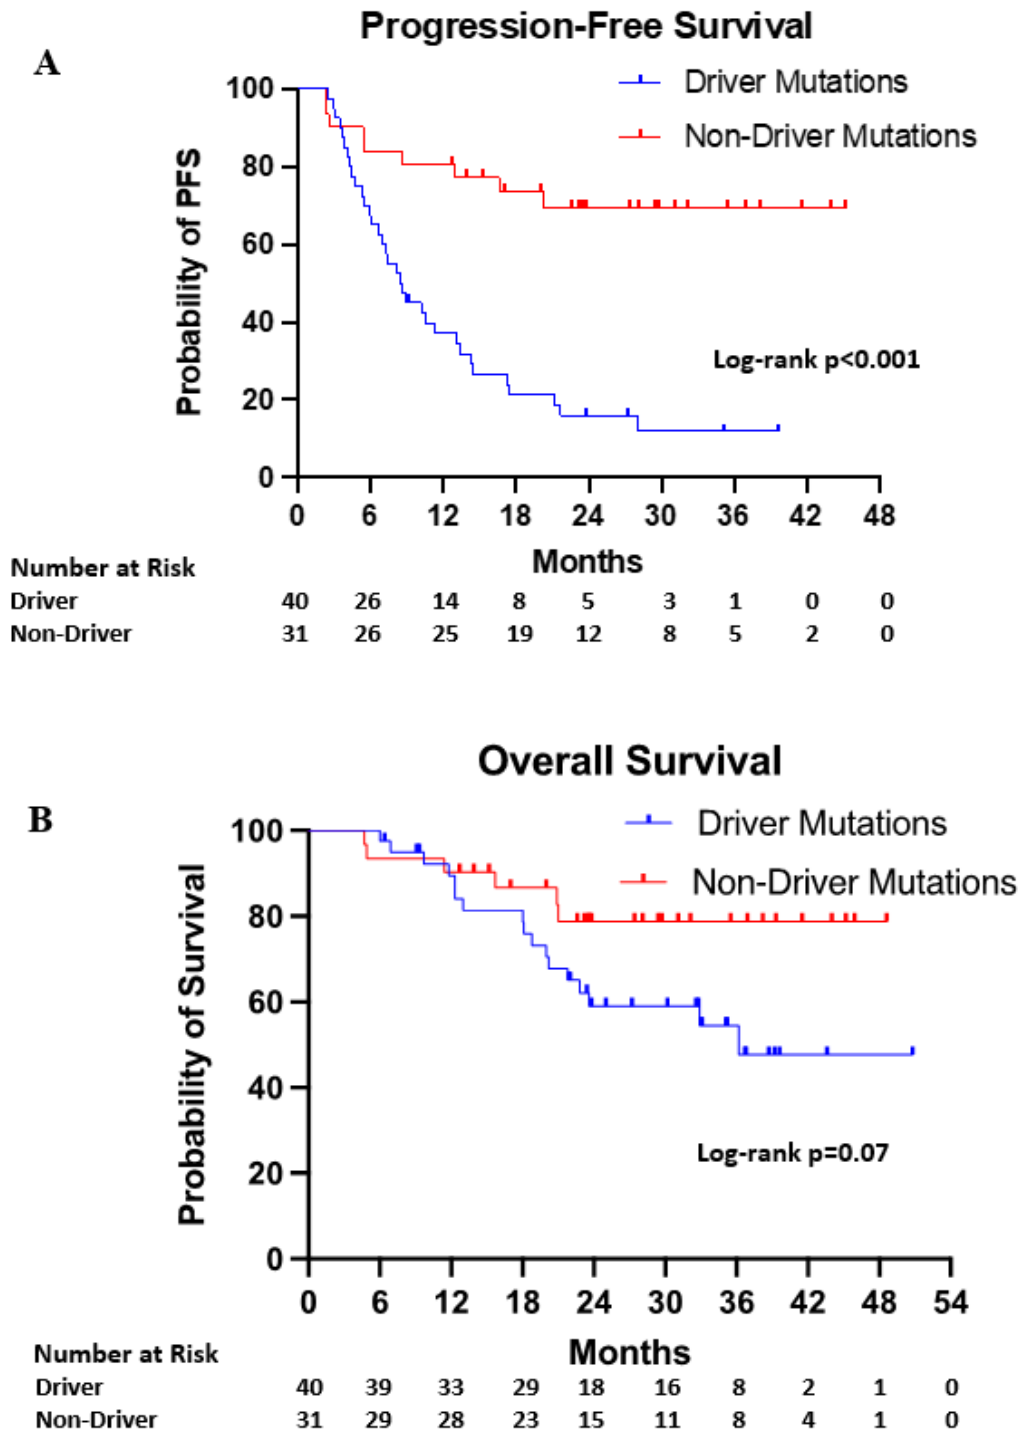

(A) Median PFS time was 8.5 months for patients with driver mutations versus not reached in patients without driver mutations (log-rank  $P < 0.001$ ). (B) Median OS time was 36.2 months for those with driver mutations and was not reached in those without driver mutations (log-rank  $P = 0.07$ ).

**eFigure 2.** Time to Second Progression in Patients With or Without Driver Variations Who Progressed After Definitive Chemoradiation and Consolidative Durvalumab

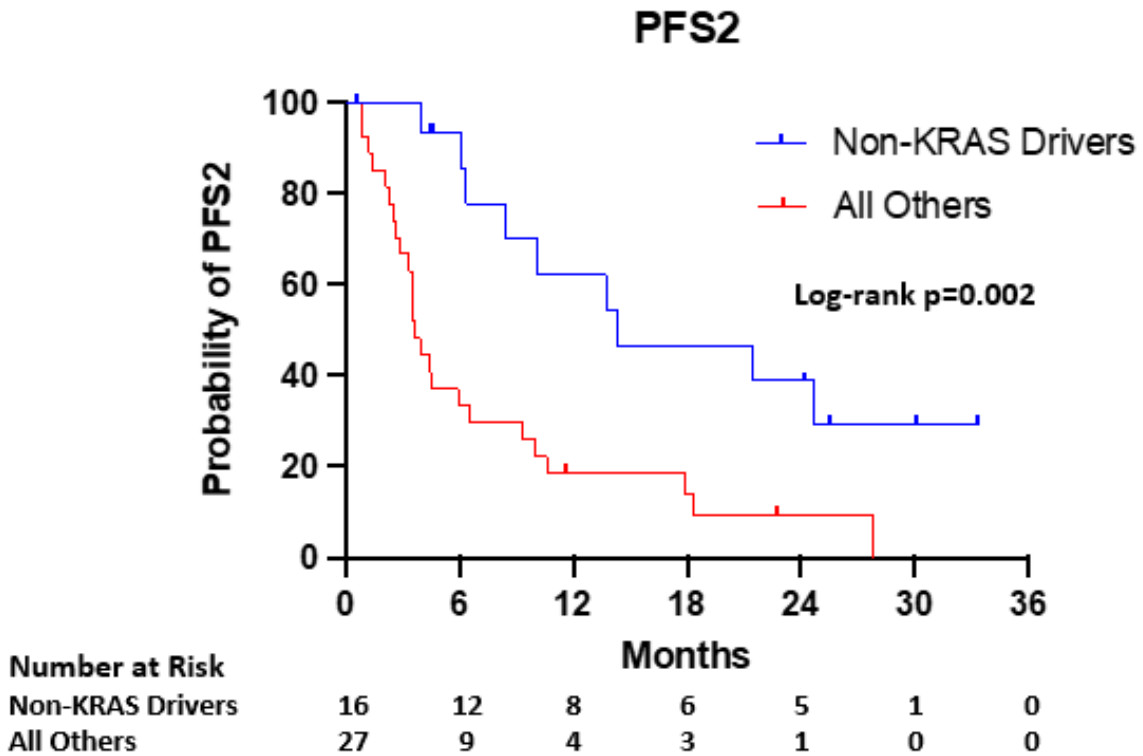

Median time to second disease progression (PFS2) was 14.3 months for patients with non-KRAS driver mutations versus 3.9 months for all other patients (log-rank  $P=0.002$ ).
